# Supplementary material
Source: Springer Nature journal article supplement (https://www.springermedizin.de/resource/supplementary/12967_2007_220_MOESM3_ESM.pdf/9575978)

**Survival Distribution Function**

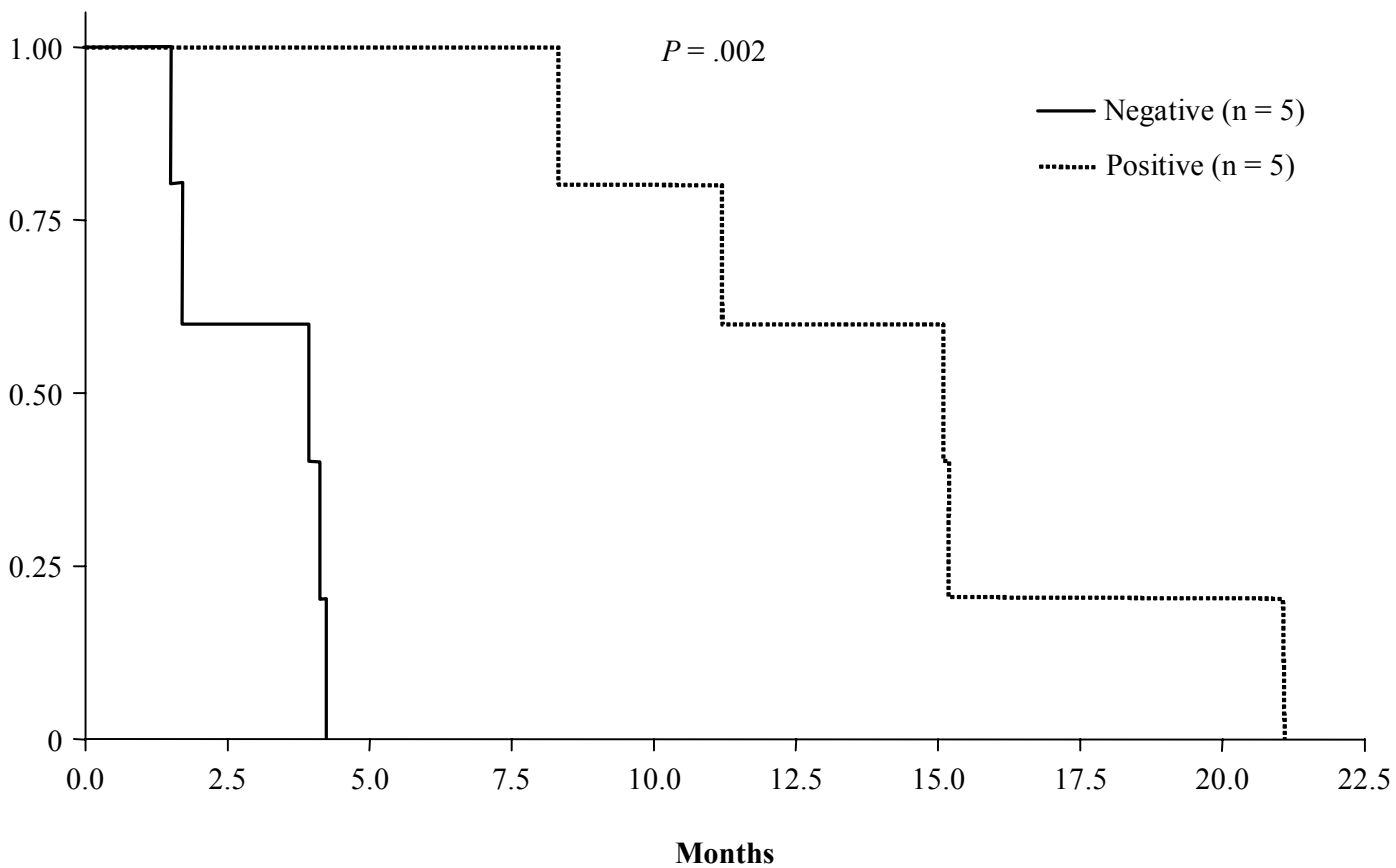

Supplement: MOESM3 [file 9575978]
